# Supplementary material for: An Early Pandemic Analysis of SARS-CoV-2 Population Structure and Dynamics in Arizona
Source: PubMed Central journal article supplement (PMC7474171; doi:10.1128/mbio.02107-20), 2020-09-04
Supplement: mBio.02107-20-sf002.pdf [file mBio.02107-20-sf002.pdf]

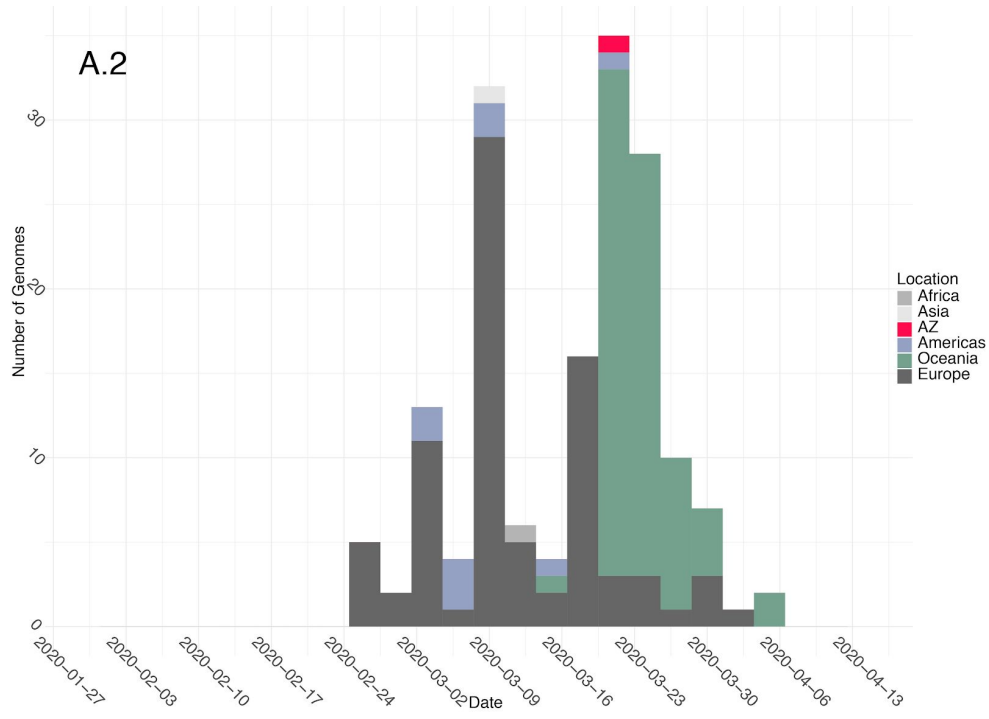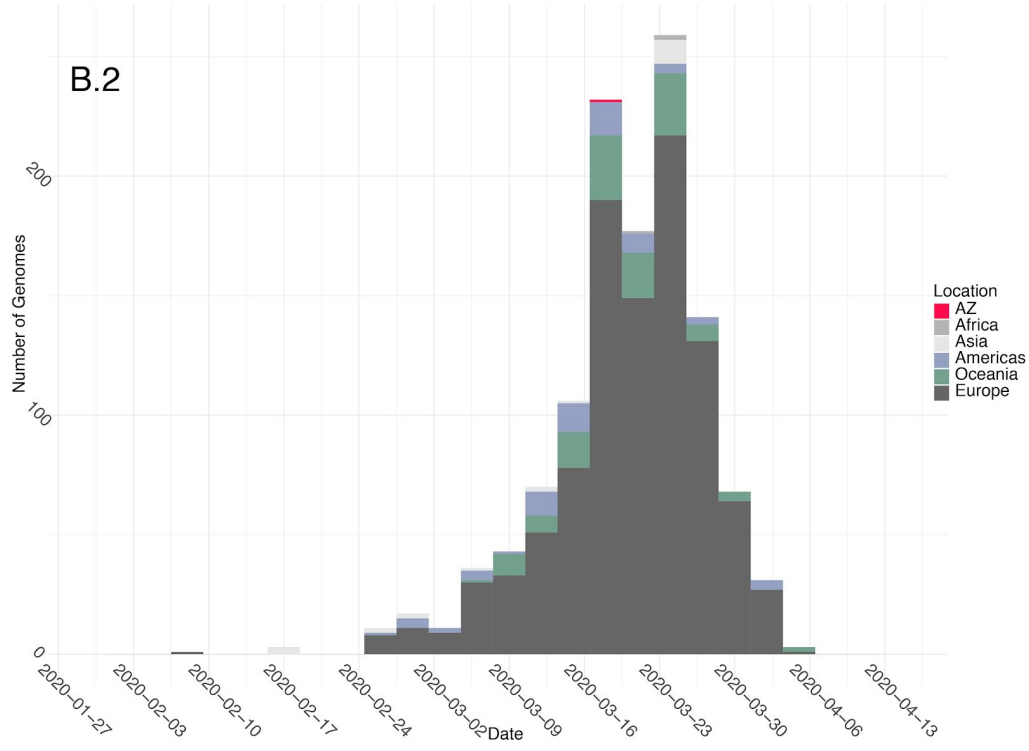

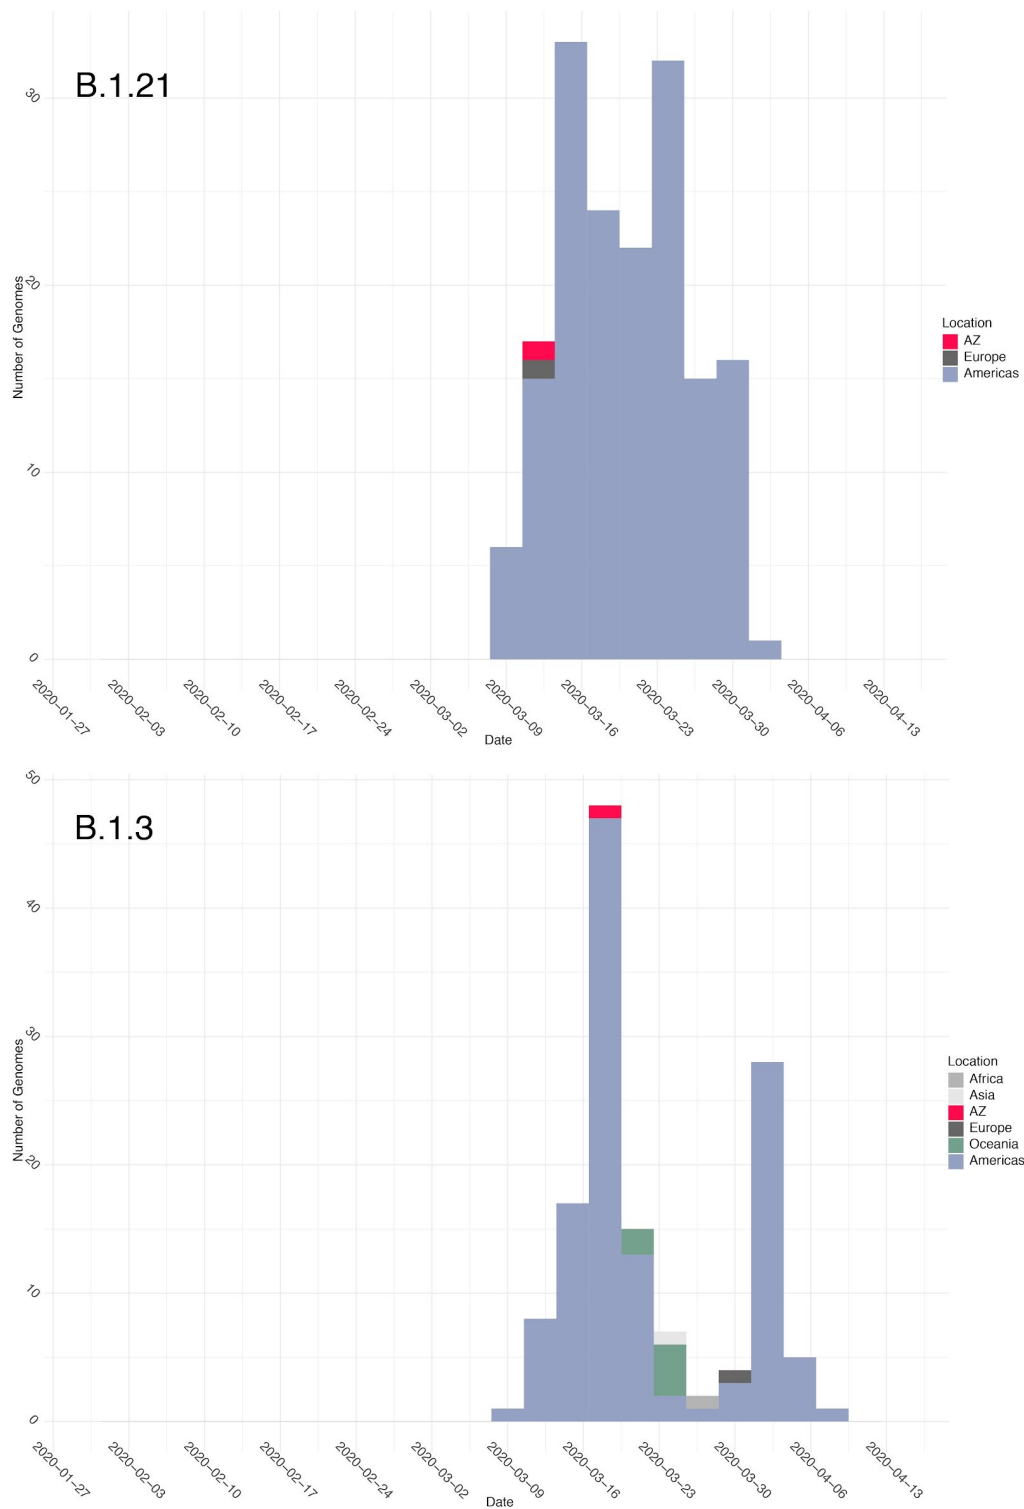

**Figure S2.** Sequence database representation through time for the 4 introductions with only 1 sequence representative from Arizona. Stacked bars are colored according to location. Lineages were assigned using Pangolin for all sequences uploaded to GISAID as of 4/16/2020.
