# Supplementary material for: An Early Pandemic Analysis of SARS-CoV-2 Population Structure and Dynamics in Arizona
Source: PubMed Central journal article supplement (PMC7474171; doi:10.1128/mbio.02107-20), 2020-09-04
Supplement: mBio.02107-20-st003.pdf [file mBio.02107-20-st003.pdf]

**Table S3.** Genome representation from each Arizona county. This does not include all genomes because some are from unknown counties.

| <b>County</b>     | <b>Number of positive cases*</b> | <b>Number of genomes sequenced</b> |
|-------------------|----------------------------------|------------------------------------|
| Apache            | 118                              | 0                                  |
| Cochise           | 18                               | 1                                  |
| Coconino          | 299                              | 22                                 |
| Gila              | 5                                | 0                                  |
| Graham            | 2                                | 1                                  |
| Greenlee          | 2                                | 0                                  |
| La Paz            | 5                                | 1                                  |
| Maricopa          | 2,264                            | 31                                 |
| Mohave            | 51                               | 1                                  |
| Navajo            | 410                              | 4                                  |
| Pima              | 760                              | 4                                  |
| Pinal             | 197                              | 7                                  |
| Santa Cruz        | 14                               | 0                                  |
| Yavapai           | 68                               | 3                                  |
| Yuma              | 21                               | 1                                  |
| <b>Totals</b>     | <b>4234</b>                      | <b>76</b>                          |
| * As of 4/16/2020 |                                  |                                    |
