# Supplementary material for: An Early Pandemic Analysis of SARS-CoV-2 Population Structure and Dynamics in Arizona
Source: PubMed Central journal article supplement (PMC7474171; doi:10.1128/mbio.02107-20), 2020-09-04
Supplement: mBio.02107-20-st004.pdf [file mBio.02107-20-st004.pdf]

**Table S4.** *In silico* screen of commonly used primers/probes to detect SARS-CoV-2.

| Assay            | Forward                       | Reverse                    | Probe                            | Total | Hits | Misses | Ambiguous |
|------------------|-------------------------------|----------------------------|----------------------------------|-------|------|--------|-----------|
| Orf1ab           | CCCTGTGGGTTTT<br>ACACTTAA     | ACGATTGTGCAT<br>CAGCTGA    | CCGTCTGCGGTATG<br>TGGAAAGGTTATGG | 388   | 370  | 0      | 18        |
| N (China)        | GGGGAACCTTCTC<br>CTGCTAGAAT   | CAGACATTTTGC<br>TCTCAAGCTG | TTGCTGCTGCTTGA<br>CAGATT         | 388   | 327  | 58     | 3         |
| n_cov_n1         | GACCCCAAAATCA<br>GCGAAAT      | TCTGGTTACTGC<br>CAGTTGAAT  | ACCCCGCATTACGT<br>TTGGTGGACC     | 388   | 379  | 6      | 3         |
| n_cov_n2         | TTACAAACATTGG<br>CCGCAAA      | GCGCGACATTC<br>CGAAGAA     | ACAATTTGCCCCCA<br>GCGCTTCAG      | 388   | 386  | 0      | 2         |
| n_cov_n3         | GGGAGCCTTGAA<br>TACACCAAAA    | TGTAGCACGATT<br>GCAGCATTG  | AYCACATTGGCACC<br>CGCAATCCTG     | 388   | 386  | 0      | 2         |
| E<br>(Sarbeco)   | ACAGGTACGTAA<br>TAGTTAATAGCGT | ATATTGCAGCA<br>GTACGCACACA | ACACTAGCCATCCT<br>TACTGCGCTTCG   | 388   | 384  | 2      | 2         |
| nsp10<br>(China) | CCCTGTGGGTTTT<br>ACACTTAA     | ACGATTGTGCAT<br>CAGCTGA    | CCGTCTGCGGTATG<br>TGGAAAGGTTATGG | 388   | 370  | 0      | 18        |
| nsp14            | TAATCAGACAAGG<br>AACTGATTA    | CGAAGGTGTGA<br>CTTCCATG    | GCAAATTGTGCAAT<br>TTGCGG         | 388   | 384  | 2      | 2         |
| N (HKU)          | TAATCAGACAAGG<br>AACTGATTA    | CGAAGGTGTGA<br>CTTCCATG    | GCAAATTGTGCAAT<br>TTGCGG         | 388   | 383  | 2      | 3         |
| nsp14<br>(HKU)   | TGGGGYTTTACR<br>GGTAACCT      | AACRCGCTTAA<br>CAAAGCACTC  | TAGTTGTGATGCWA<br>TCATGACTAG     | 388   | 385  | 0      | 3         |
| RdRp<br>(IP2)    | ATGAGCTTAGTCC<br>TGTTG        | CTCCCTTTGTTG<br>TGTTGT     | AGATGTCTTGTGCT<br>GCCGGTA        | 388   | 387  | 0      | 1         |
| RDRP<br>(IP4)    | GGTAACTGGTAT<br>GATTTCCG      | CTGGTCAAGGT<br>TAATATAGG   | TCATACAAACCACG<br>CCAGG          | 388   | 388  | 0      | 0         |
