# Supplementary material for: An Early Pandemic Analysis of SARS-CoV-2 Population Structure and Dynamics in Arizona
Source: PubMed Central journal article supplement (PMC7474171; doi:10.1128/mbio.02107-20), 2020-09-04
Supplement: mBio.02107-20-st005.pdf [file mBio.02107-20-st005.pdf]

**Table S5.** Model comparison results from the generalized stepping stone sampling analyses. The best-fitting model likelihood and estimates are bolded.

| <b>Model Combination</b> | <b>log marginal likelihood</b> | <b>Mean TMRCA Estimate</b> | <b>Median TMRCA Estimate</b> | <b>TMRCA 95% CI</b>        | <b>Dates 95% CI</b>          | <b>meanRate</b> |
|--------------------------|--------------------------------|----------------------------|------------------------------|----------------------------|------------------------------|-----------------|
| Strict Exponential       | -46733                         | 2019.8321                  | 2019.837                     | 2019.7464-2019.9111        | Sept. 30-Nov. 29, 2019       | 1.01E-03        |
| <b>Strict Skygrid</b>    | <b>-46678</b>                  | <b>2019.8968</b>           | <b>2019.904</b>              | <b>2019.8228-2019.9578</b> | <b>Oct. 28-Dec. 16, 2019</b> | <b>9.74E-04</b> |
| UCLN Exponential         | -46734                         | 2019.8225                  | 2019.8332                    | 2019.7024-2019.9207        | Sept. 14-Dec. 3, 2019        | 1.03E-03        |
| UCLN Skygrid             | -46695                         | 2019.9183                  | 2019.9274                    | 2019.8413-2019.9772        | Nov. 11-Dec. 23, 2019        | 1.01E-03        |
